# Supplementary material for: The chaperonin CCT8 controls proteostasis essential for T cell maturation, selection, and function
Source: PubMed Central journal article supplement (PMC8175432; doi:10.1038/s42003-021-02203-0), 2021-06-03
Supplement: 42003_2021_2203_MOESM2_ESM.pdf [file 42003_2021_2203_MOESM2_ESM.pdf]

## Supplementary material

# The chaperonin CCT8 controls proteostasis essential for T cell maturation, selection, and function

Bergithe E Oftedal, Stefano Maio, Adam Handel, Madeleine PJ White, Duncan Howie, Simon Davis, Nicolas Prevot, Ioanna A. Rota, Mary E Deadman, Benedikt M Kessler, Roman Fischer, Nikolaus S Trede, Erdinc Sezgin, Rick M Maizels, Georg A Holländer

### Table of Content

|                                                                                                                            |        |
|----------------------------------------------------------------------------------------------------------------------------|--------|
| <b>Table S1.</b> Statistical significance for the cell survival at different timepoints .....                              | Page 2 |
| <b>Figure S1.</b> Selection and maturation of cortical and medullary thymocytes in<br>the absence of CCT8 expression ..... | Page 3 |
| <b>Figure S2.</b> Proteomic analysis of activated CD4 cells.....                                                           | Page 4 |
| <b>Figure S3.</b> Peripheral T cell function in the absence of CCT8 expression .....                                       | Page 5 |
| <b>Figure S4.</b> The response to <i>H. polygyrus</i> infection in CCT8-deficient mice .....                               | Page 6 |

Supplementary table 1. Statistical significance for the cell survival at different timepoints

| <b>Time Point</b> | <b>Without IL-2</b>                              | <b>P-value</b> |    |
|-------------------|--------------------------------------------------|----------------|----|
| 0 hrs             | CCT8 <sup>T+/+</sup> versus CCT8 <sup>T-/-</sup> | 0,999546       | ns |
| 8 hrs             | CCT8 <sup>T+/+</sup> versus CCT8 <sup>T-/-</sup> | 0,221398       | ns |
| 20 hrs            | CCT8 <sup>T+/+</sup> versus CCT8 <sup>T-/-</sup> | 0,00271        | ** |
| 96 hrs            | CCT8 <sup>T+/+</sup> versus CCT8 <sup>T-/-</sup> | 0,018598       | *  |
| <b>With IL-2</b>  |                                                  |                |    |
| 0 hrs             | CCT8 <sup>T+/+</sup> versus CCT8 <sup>T-/-</sup> | 0,999995       | ns |
| 8 hrs             | CCT8 <sup>T+/+</sup> versus CCT8 <sup>T-/-</sup> | 0,753643       | ns |
| 20 hrs            | CCT8 <sup>T+/+</sup> versus CCT8 <sup>T-/-</sup> | 0,038117       | *  |
| 96 hrs            | CCT8 <sup>T+/+</sup> versus CCT8 <sup>T-/-</sup> | 0,001376       | ** |

ns: not significant; \* p<0.05; \*\* p<0.01

Supplementary Figure 1, related to main Figure 1

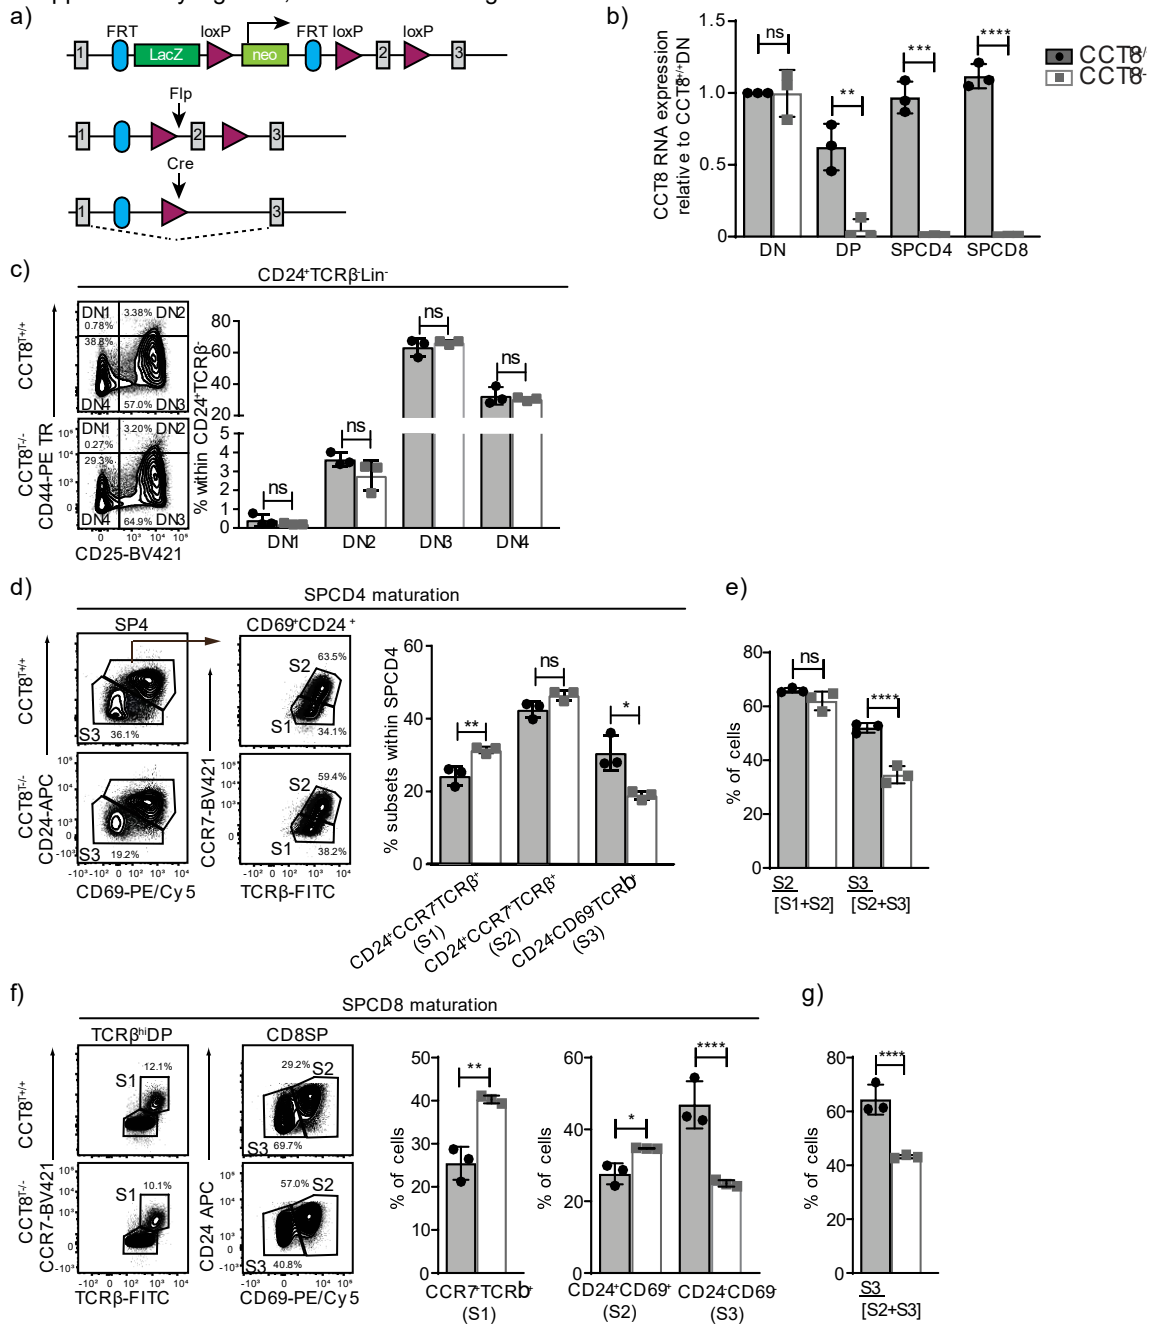

**Supplementary Figure 1. Selection and maturation of cortical and medullary thymocytes in the absence of CCT8 expression.** Data from CCT8<sup>T+/+</sup> and CCT8<sup>T-/-</sup> mice are shown in grey and white bars, respectively. **(a)** Targeting strategy for the conditional deletion of exon 3 of the *Cct8* locus. FRT: flippase recognition target; loxP: locus of X-over P1; Flp: Flippase; Cre: Cre-recombinase. **(b)** *Cct8* transcripts in CCT8<sup>T+/+</sup> and CCT8<sup>T-/-</sup> thymocytes at indicated stages of development. qPCR analysis normalised to GPDH and displayed as 2- $\Delta\Delta$ Ct CT values. **(c)** Differentiation of lineage negative CD24-TCR $\beta$ - CD4-CD8- thymocytes. Lineage negativity is defined as the absence of CD11b, CD11c, Gr1, CD19, CD49b, F4/80, NK1.1, GL3, and Ter119 expression. Left: contour plots and gating, see also Supplementary information. **(d)** SPCD4 thymocyte maturation. Left: Contour plots showing gating. Individual maturational stages, qualified as immature (CD24+CCR7-TCR $\beta$ +; S1), semimature (CD24+CCR7+TCR $\beta$ +; S2) and mature (CD24-CD69- TCR $\beta$ +; S3). **(e)** Maturation progression between sequential developmental stages. **(f)** SPCD8 thymocyte maturation. Left: Contour plots showing gating. Individual maturational stages, qualified as immature (CCR7+TCR $\beta$ +; S1), semimature (CD24+CD69+; S2) or mature (CD24-CD69-; S3). **(g)** Maturation progression between sequential developmental stages. \* $p < 0.05$ , \*\* $p < 0.01$ , \*\*\* $p < 0.001$ , \*\*\*\* $p < 0.0001$ . Data in panel b-g were calculated by Student's t-test. Bar graphs show the mean  $\pm$ SD and are representative of one of 2 independent experiments with 3 samples each.

Supplementary figure 2, related to Main Figure 3

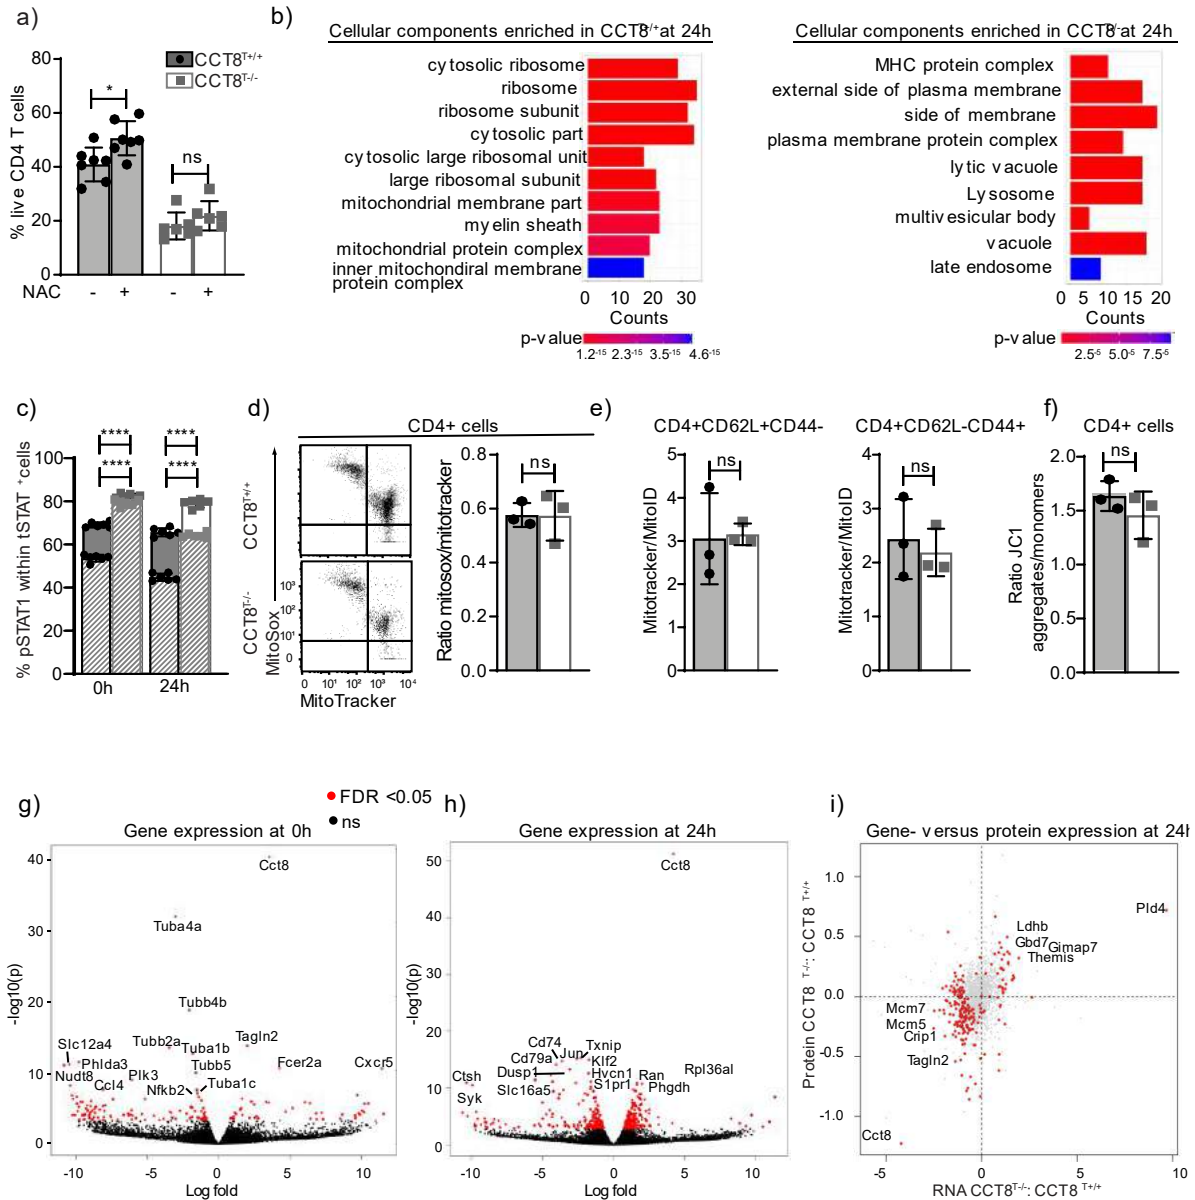

**Supplementary Figure 2. Proteomic analysis of activated CD4<sup>+</sup> cells.**

Bar graphs display data from CCT8<sup>T+/+</sup> and CCT8<sup>T-/-</sup> mice in grey and white bars, respectively. (a) Percentage of live (i.e. DAPI-) cells after *in vitro* stimulation for the indicated length of time in the presence or absence of N-acetyl-L-cysteine (NAC: 5mM). (b) Go-analysis of differentially expressed genes in CCT8<sup>T+/+</sup> and CCT8<sup>T-/-</sup> CD4<sup>+</sup> T cells stimulated *in vitro* for 24h by CD3 and CD28 crosslinking. (c) Frequency of tSTAT1 and pSTAT1 within tSTAT 0hrs and 24hrs upon activation. (d) Superoxide mediated oxidation of MitoSOX™. Cells were stimulation for 20h by CD3 and CD28 crosslinking. Representative dot plot analysis (left) of data shown in bar graphs (right). (e) Ratio of mitochondrial membrane potential (as assessed by mitoTracker) and mitochondrial mass (as measured by MitoID-red specifically bound to cardiolipin in the inner mitochondrial membrane) in CD62L<sup>-</sup>CD44<sup>-</sup> cells and CD62L<sup>+</sup>CD44<sup>+</sup> CD4<sup>+</sup> T cells stimulated *in vitro* for 20h by CD3 and CD28 crosslinking. (f) Mitochondrial membrane potential assessed by J-aggregate forming lipophilic cation 5,5',6,6'-tetrachloro-1,1',3,3'-tetraethylbenzimidazolcarbocyanine iodide (JC-1) in CD4<sup>+</sup> T cells stimulated *in vitro* for 20h by CD3 and CD28 crosslinking. (g) Volcano plots of RNA transcripts in wild type (right) vs. CCT8<sup>T-/-</sup> left CD4<sup>+</sup> T cells (g) before (0h) and (ii) after (h) *in vitro* stimulation by CD3 and CD28 crosslinking. (i) Correlation of transcriptomic (x-axis) and proteomic (y-axis) ratio data in CD4<sup>+</sup> T cells after *in vitro* stimulation for 24h by CD3 and CD28 crosslinking. Identical transcript/protein entities are shown in red. \*p<0.05, \*\*p<0.01, \*\*\*p<0.001, \*\*\*\*p<0.0001. Data in panel a was calculated by Student's t test adjusted for multiple comparisons, data in panels c-f were calculated by Student's t test. Bar graphs show the mean ±SD representative of 2 independent experiments with 3 (d-f), 7 (panel a) and 6 (panel c) samples each.

Supplementary Figure 3, related to Main Figure 4

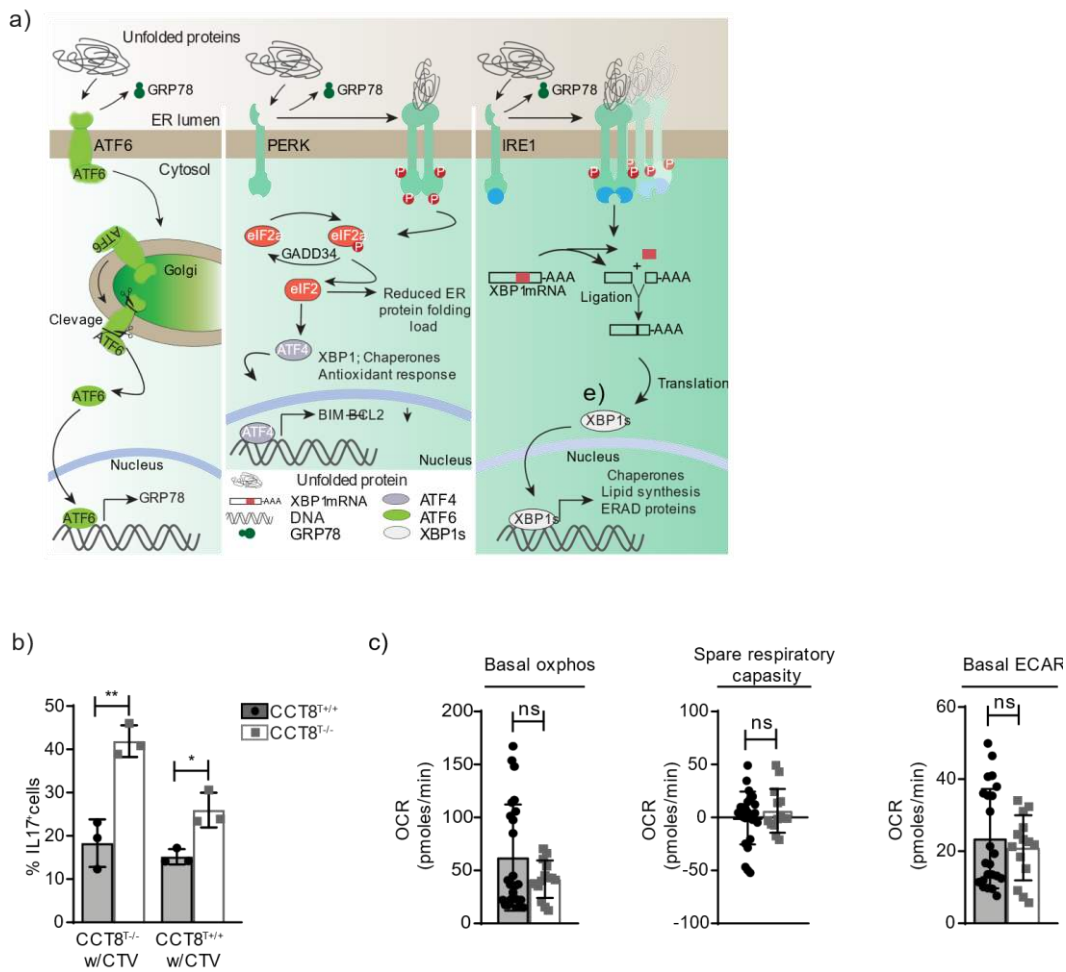

**Supplementary Figure 3. Peripheral T cell function in the absence of CCT8 expression.**

Schematic of unfolded protein response (UPR) in response to unfolded or misfolded proteins (**a**). Components whose transcripts were examined are shown in bold. (**b**) *In vitro* Th17 polarization of separately labelled CCT8<sup>T+/+</sup> and CCT8<sup>T-/-</sup> CD4<sup>+</sup> T cells stimulated in co-cultures. Left bars show the frequency of Th17 cells in cultures where CCT8<sup>T-/-</sup> T cells were labelled with cell trace violet (CVT) labelled; right bars show the frequency of Th17 cells in cultures where CCT8<sup>T+/+</sup> T cells were labelled with CVT. (**c**) Determination by Seahorse XF Analyser of basal oxidative phosphorylation, spare respiratory capacity, and basal extracellular acidification rate (ECAR) in CCT8<sup>T+/+</sup> and CCT8<sup>T-/-</sup> CD4<sup>+</sup> T cells stimulated for 20h by CD3 and CD28 crosslinking. OCR: oxygen consumption rate. \*p<0.05, \*\*p<0.01. Data in panel b was calculated by Student's t test, and data in panel c was calculated by Student's t test adjusted for multiple comparisons. Bar graphs show the mean  $\pm$ SD representative of two independent experiments with three replicates (panel b) and display the combined results of three independent experiments with 14 CCT8<sup>T+/+</sup> samples and 23 CCT8<sup>T-/-</sup> samples (panel c).

Supplementary Figure 4, related to Main Figure 5

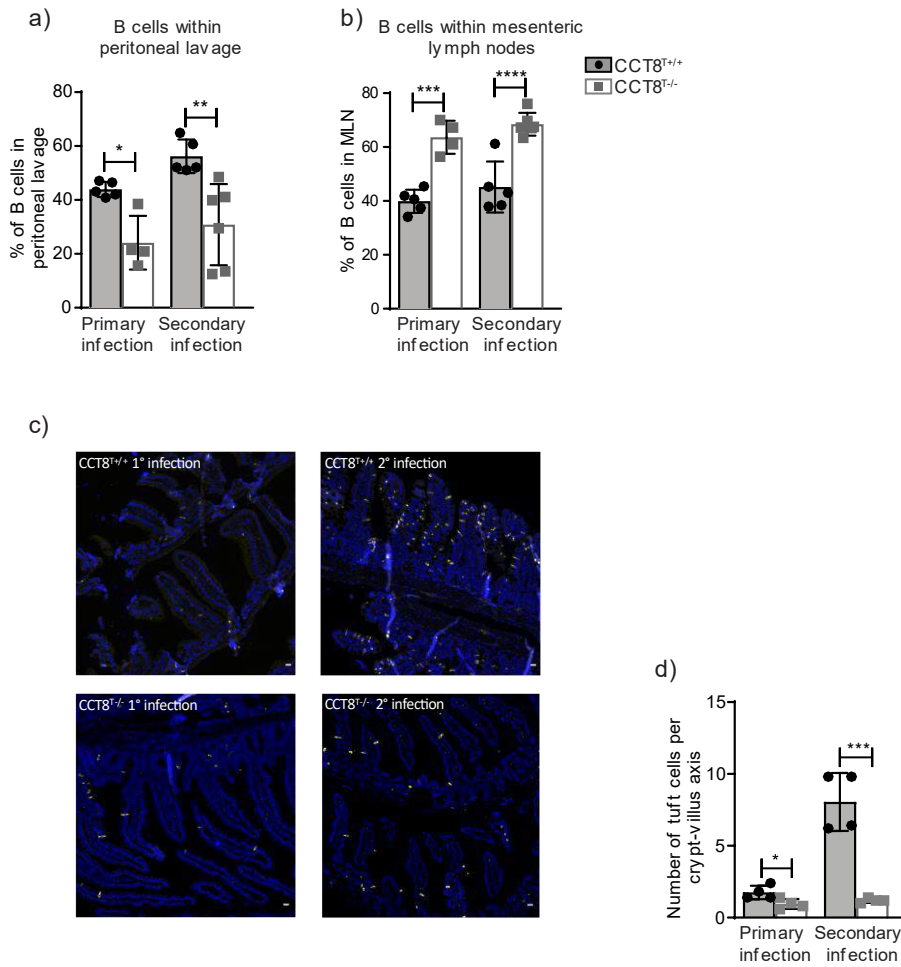

**Supplementary Figure 4. The response to *H. polygyrus* infection in CCT8-deficient mice.**

Frequency of B cells in peritoneal lavage (a) and the mesenteric lymph nodes (b) of CCT8<sup>T+/+</sup> (grey bars) and CCT8<sup>T-/-</sup> mice (white bars). (b) Tuft cells in the small intestine of *H. polygyrus* infected CCT8<sup>T+/+</sup> and CCT8<sup>T-/-</sup> mice 14 days after primary and re-infection as indicated. (c) Sections shown represent data from mice with median egg counts in each experimental group. For Dcl1 staining: yellow; DAPI: blue. Scale bar in right lower corner represents 20  $\mu$ m. (d) Number of tuft cells in wild type (grey bars) and mutant (white bars) mice. \* $p < 0.05$ , \*\* $p < 0.01$ , \*\*\* $p < 0.001$ , \*\*\*\* $p < 0.0001$ . Data was calculated by Student's t test adjusted for multiple comparison. Bar graphs in panel a show the mean  $\pm$ SD representative of one of 2 independent experiments with at least 4 samples (CCT8<sup>T+/+</sup> primary infection: 5 mice, secondary infection 5 mice; CCT8<sup>T-/-</sup> primary infection 4 mice, secondary infection 6 mice). Data in panel c is representative of 4 separately analysed sections per experimental group.
