# Supplementary material for: The chaperonin CCT8 controls proteostasis essential for T cell maturation, selection, and function
Source: PubMed Central journal article supplement (PMC8175432; doi:10.1038/s42003-021-02203-0), 2021-06-03
Supplement: 42003_2021_2203_MOESM3_ESM.pdf [file 42003_2021_2203_MOESM3_ESM.pdf]

## **Description of Additional Supplementary Files**

**File name:** Supplementary Data 1

**Description:** Tables containing the data used in the statistical analysis for all figures.

**File name:** Supplementary Data 2

**Description:** FACS gating strategy for all panels included in the study.

**File name:** Supplementary Data 3

**Description:** Table containing fold difference at timepoint 0hrs and 24hrs in the proteomic and transcriptomic data.

**File name:** Supplementary Data 4

**Description:** Key resource table listing antibodies, commercial kits, oligonucleotides, and analysis software used.

**File name:** Supplementary Data 5

**Description:** The complete western blot from figure 1a.
