# Supplementary material for: The chaperonin CCT8 controls proteostasis essential for T cell maturation, selection, and function
Source: PubMed Central journal article supplement (PMC8175432; doi:10.1038/s42003-021-02203-0), 2021-06-03
Supplement: 42003_2021_2203_MOESM5_ESM.pdf [file 42003_2021_2203_MOESM5_ESM.pdf]

Supplemental item 1 relate to Main Figure 1 and Figure S1

a. DN/DP/SPCD4/SPCD8, gating strategy

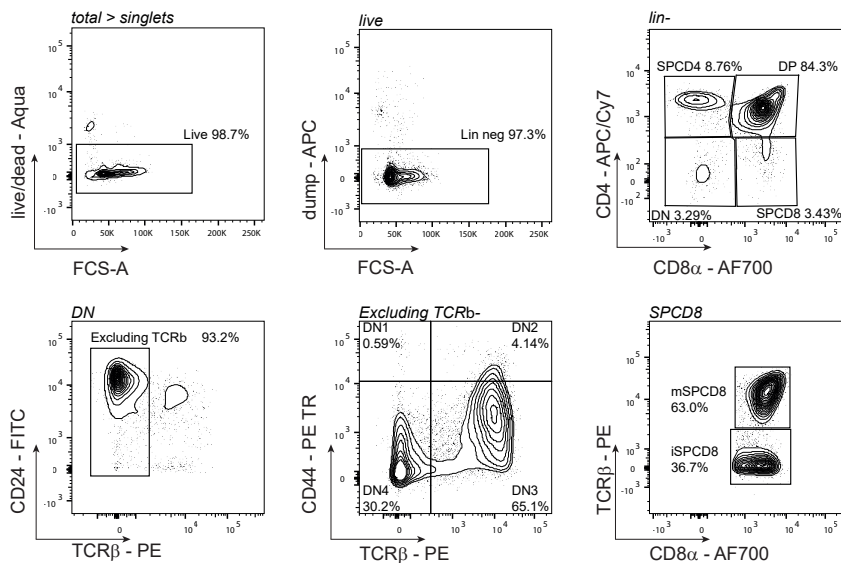

b. positive selection, gating strategy

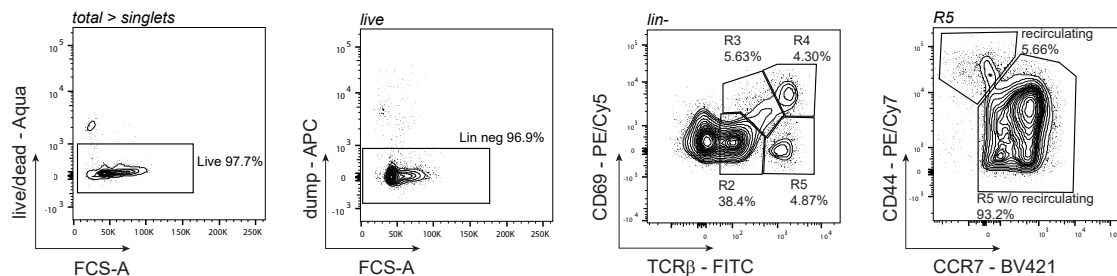

**Supplemental item 1a.** Representative gating strategy for identification of DN(CD4<sup>-</sup>CD8<sup>-</sup>), DP(CD4<sup>+</sup>CD8<sup>+</sup>), SPCD4 and SPCD8 by Flow Cytometry.

**Supplemental item 1b.** Representative gating strategy for identification of stages R2 (CD69<sup>-</sup>TCRβ<sup>lo</sup>), R3 (CD69<sup>-</sup>TCRβ<sup>hi</sup>), R4(CD69<sup>+</sup>TCRβ<sup>hi</sup>), R5(CD69<sup>-</sup>TCRβ<sup>hi</sup>) by Flow Cytometry.

SM M1 M2 gating strategy

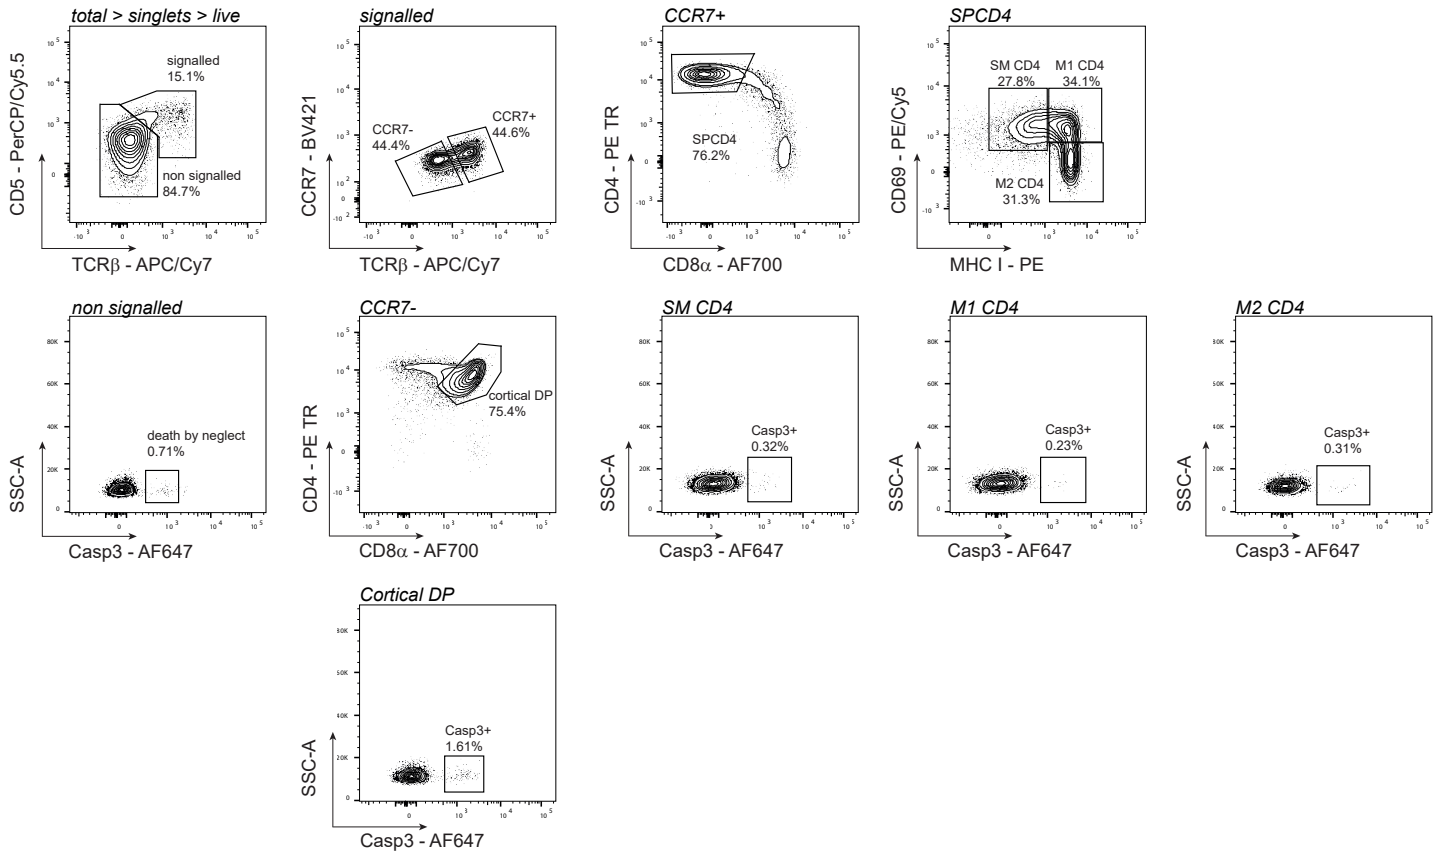

**Supplemental item 2.** Representative gating strategy for identification of signalled thymocytes ( $\text{TCR}\beta^{\text{lo}}\text{CD5}^+$ ), non signalled thymocytes ( $\text{TCR}\beta^{\text{hi}}\text{CD5}^+$ ), SM CD4 ( $\text{TCR}\beta^{\text{hi}}\text{CD5}^+\text{CCR7}^+\text{CD69}^+\text{MHC I}^-$ ), M1 CD4 ( $\text{TCR}\beta^{\text{hi}}\text{CD5}^+\text{CCR7}^+\text{CD69}^+\text{MHC I}^+$ ), M2 CD4 ( $\text{TCR}\beta^{\text{hi}}\text{CD5}^+\text{CCR7}^+\text{CD69}^- \text{MHC I}^+$ ) by Flow Cytometry.

Supplemental item 3 relate to Main Figure1 and Figure S1

negative selection, gating strategy

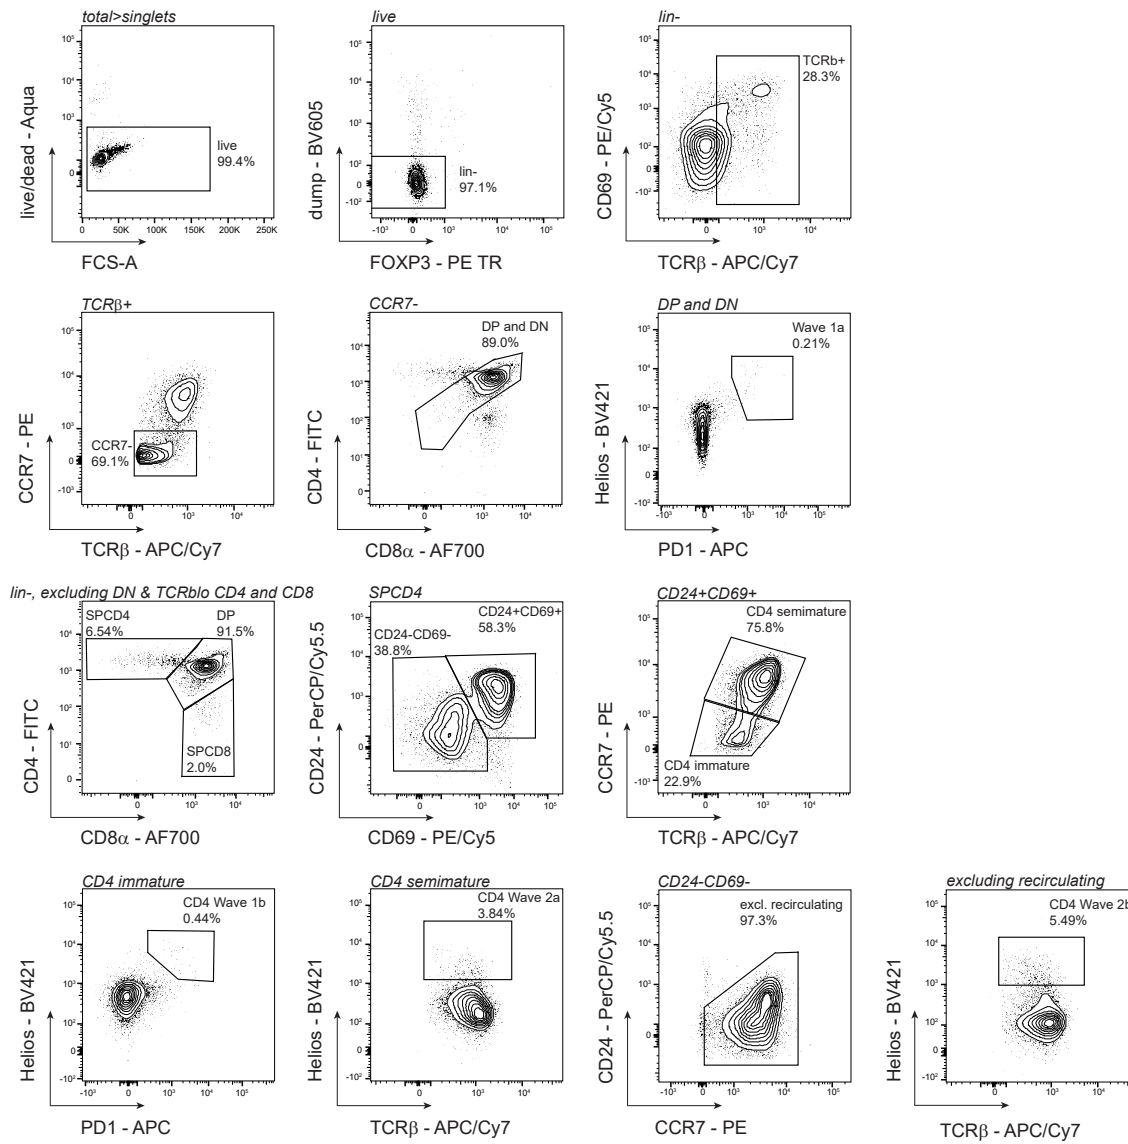

**Supplemental item 3.** Representative gating strategy for identification of Wave 1a (TCR $\beta$ <sup>+</sup>CCR7<sup>-</sup>CD4<sup>+</sup>-CD8<sup>+</sup>-Helios<sup>+</sup>PD1<sup>+</sup>), CD4 Wave 1b (TCR $\beta$ <sup>+</sup>CCR7<sup>-</sup>CD4<sup>+</sup>CD8<sup>-</sup>CD24<sup>+</sup>CD69<sup>+</sup>Helios<sup>+</sup>PD1<sup>+</sup>), CD4 Wave 2a (TCR $\beta$ <sup>+</sup>CCR7<sup>-</sup>CD4<sup>+</sup>CD8<sup>-</sup>CD24<sup>+</sup>CD69<sup>-</sup>Helios<sup>+</sup>), CD4 Wave 2b (TCR $\beta$ <sup>+</sup>CCR7<sup>-</sup>CD4<sup>+</sup>CD8<sup>-</sup>CD24<sup>+</sup>CD69<sup>-</sup>Helios<sup>+</sup>) by Flow Cytometry.

thymic Tregs, gating strategy

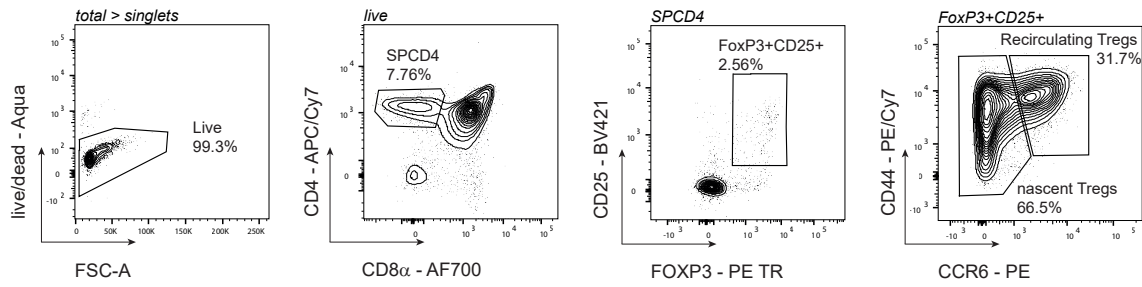

**Supplemental item 4.** Representative gating strategy for identification of total thymic Tregs (CD4<sup>+</sup>CD25<sup>+</sup>FoxP3<sup>+</sup>), nascent Tregs (CD4<sup>+</sup>CD25<sup>+</sup>FoxP3<sup>+</sup>CCR6<sup>-</sup>), recirculating Tregs (CD4<sup>+</sup>CD25<sup>+</sup>FoxP3<sup>+</sup>CD44<sup>hi</sup>CCR6<sup>+</sup>) by Flow Cytometry.

Supplemental item 5 realte to Main Figure 2

a. memory vs naive and Anergic T cells, gating strategy

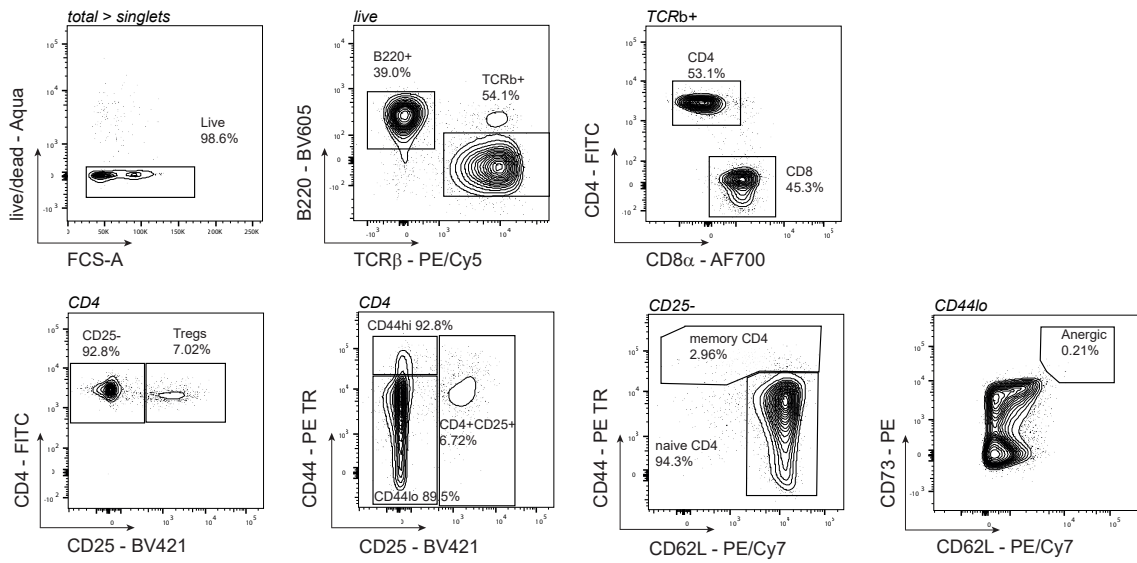

b. peripheral Tregs, gating strategy

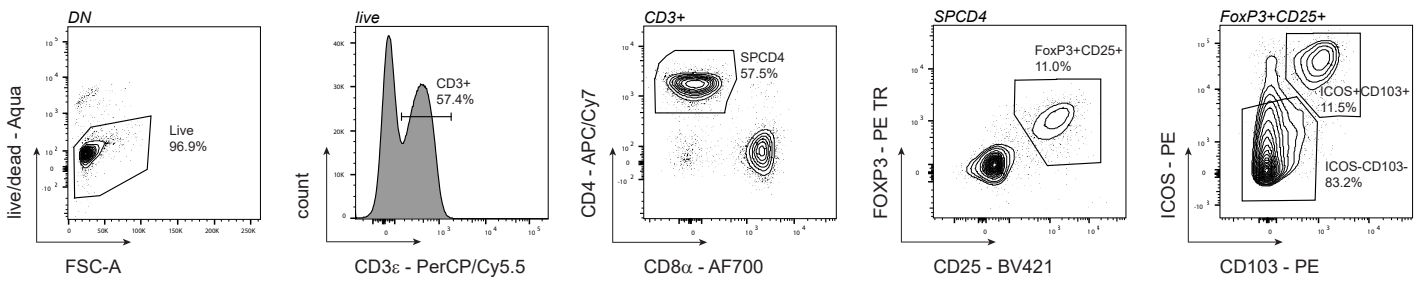

**Supplemental item 5a.** Representative gating strategy for identification of peripheral B cells (TCRβ<sup>+</sup>B220<sup>+</sup>), CD4 (TCRβ<sup>+</sup>CD4<sup>+</sup>CD8<sup>-</sup>CD25<sup>-</sup>), memory CD4 (TCRβ<sup>+</sup>CD4<sup>+</sup>CD8<sup>-</sup>CD25<sup>-</sup>CD44<sup>hi</sup>CD62L<sup>-</sup>), naive CD4 (TCRβ<sup>+</sup>CD4<sup>+</sup>CD8<sup>-</sup>CD25<sup>-</sup>CD44<sup>lo</sup>CD62L<sup>-</sup>), anergic CD4 (TCRβ<sup>+</sup>CD4<sup>+</sup>CD44<sup>lo</sup>FR4<sup>+</sup>CD73<sup>+</sup>) by Flow Cytometry.

**Supplemental item 5b.** Representative gating strategy for identification of peripheral recirculating regulatory Tregs (CD3<sup>+</sup>CD4<sup>+</sup>CD25<sup>+</sup>FoxP3<sup>+</sup>ICOS<sup>+</sup>CD103<sup>+</sup>) by Flow Cytometry.

Supplemental item 6 relate to Main Figure 3 and Figure S2

a. tSTAT1 and pSTAT1, gating strategy

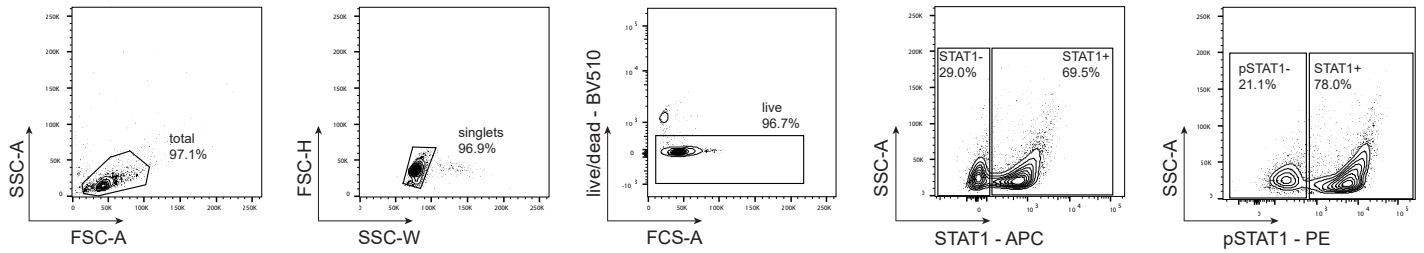

b. MitoSox/MitoTracker, gating strategy

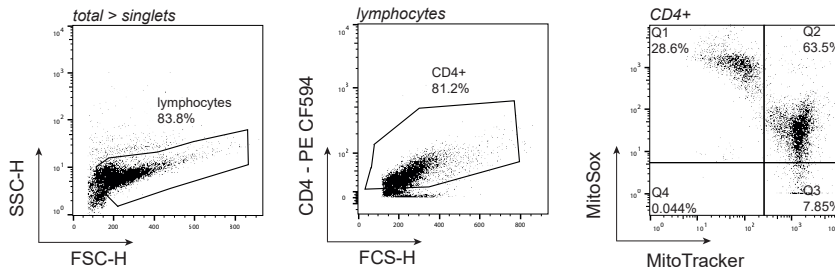

c. JC1, gating strategy

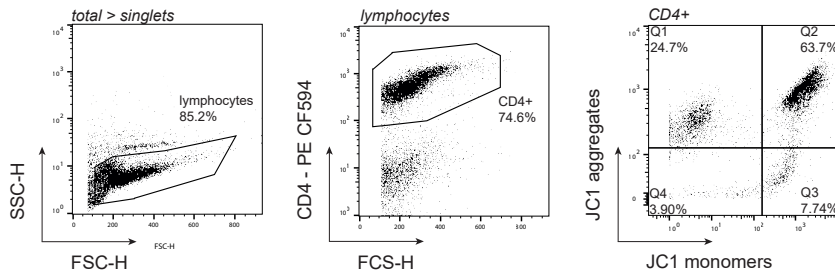

**Supplemental item 6a.** Representative gating strategy for identification and measurement of total STAT1 and pSTAT1 in naive CD4 cells by Flow Cytometry.

**Supplemental item 6b.** Representative gating strategy for measurement of superoxide/mitochondrial ROS vs. total mitochondria in peripheral naive CD4 cells by Flow Cytometry.

**Supplemental item 6c.** Representative gating strategy for measurement of JC1 aggregates vs. monomers in peripheral naive CD4 cells by Flow Cytometry.

Supplemental item 7 relate to Main Figure 4

a. Th1 polarisation

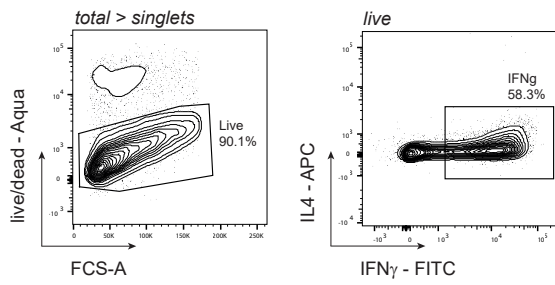

b. Th2 polarisation

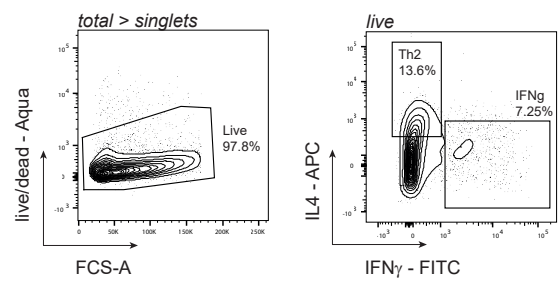

c. Treg polarisation

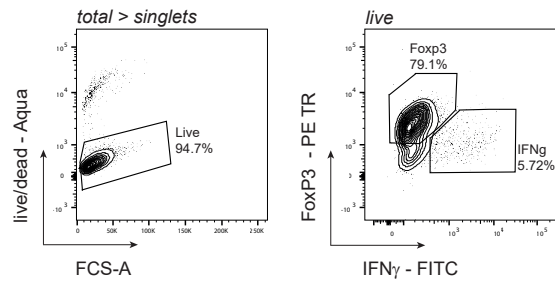

d. Th17 polarisation

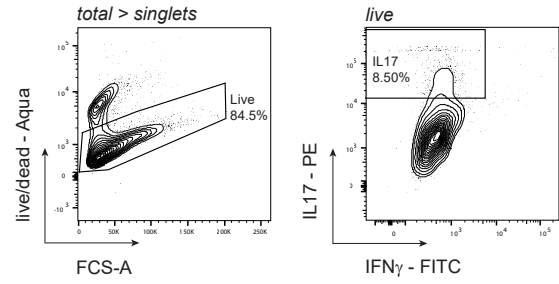

**Supplemental item 7.** Representative gating strategy for measurement of cytokines productions in a. Th1, b. Th2, c. Treg, d. Th17 polarisation assays in peripheral naive CD4 cells by Flow Cytometry.

Supplemental item 8 relate to Main Figure 5 and Figure S4

a. T cell gating strategy

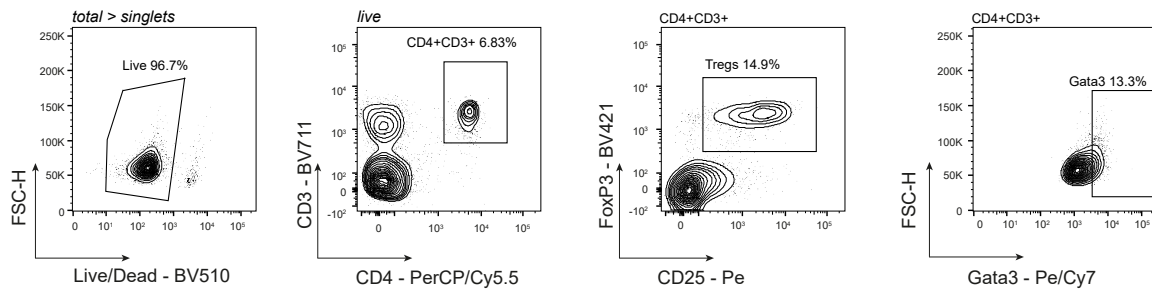

b. Myeloid gating strategy

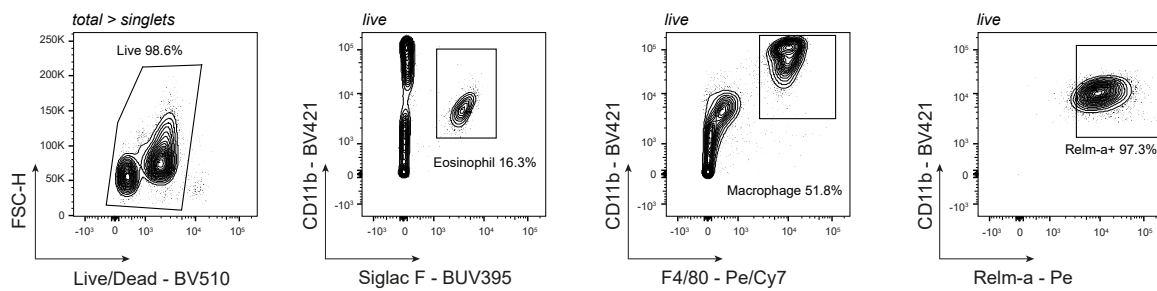

c. B cell gating strategy

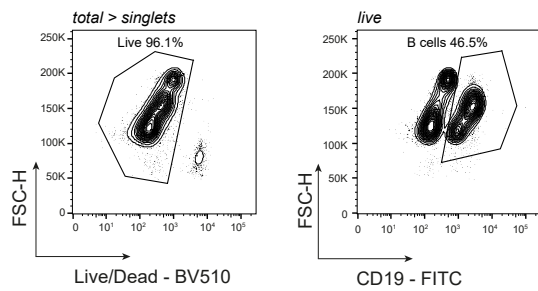

d. ILC2 gating strategy

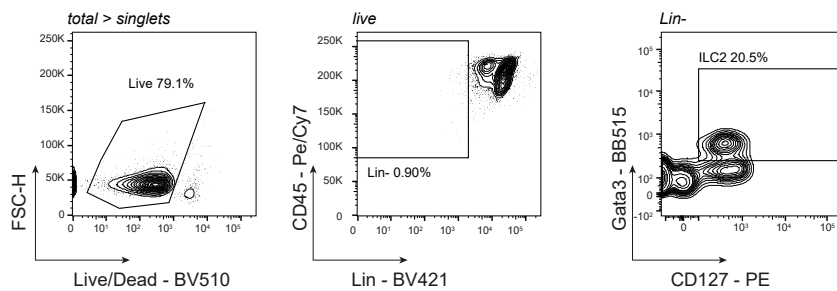

**Supplemental item 8a.** Representative gating strategy for identification of T cells by Flow Cytometry.

**Supplemental item 8b.** Representative gating strategy for identification of Myeloid cells by Flow Cytometry.

**Supplemental item 8c.** Representative gating strategy for identification of B cells by Flow Cytometry.

**Supplemental item 8b.** Representative gating strategy for identification of ILC2 cells by Flow Cytometry.
